# Supplementary material
Source: PubMed Central journal article supplement (PMC5853869)

# Supplement Figure 1

Frontal lobe white matter

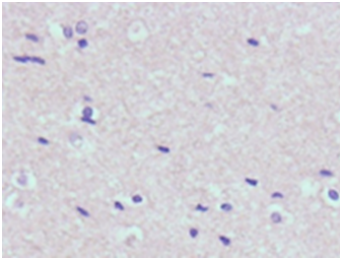

Parietal lobe white matter

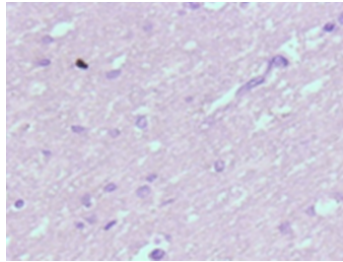

Temporal lobe white matter

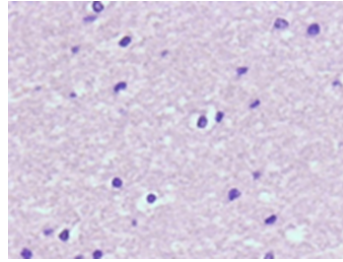

Occipital lobe white matter

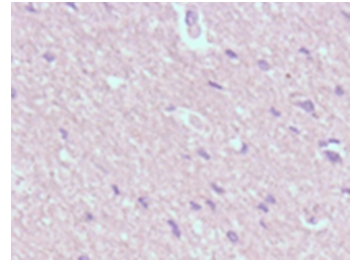

Frontal lobe gray matter

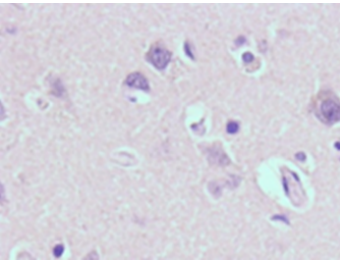

Parietal lobe gray matter

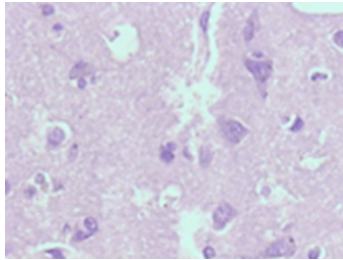

Temporal lobe gray matter

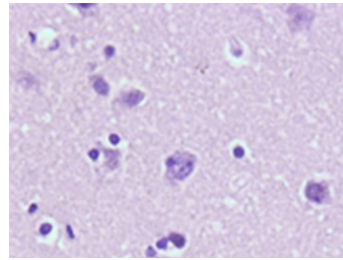

Occipital lobe gray matter

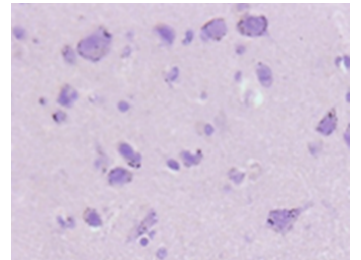

Hippocampus white matter

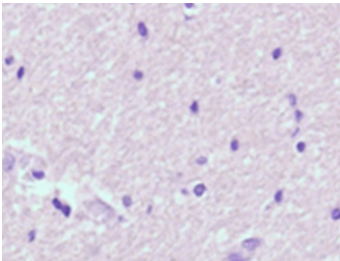

Cerebellum white matter

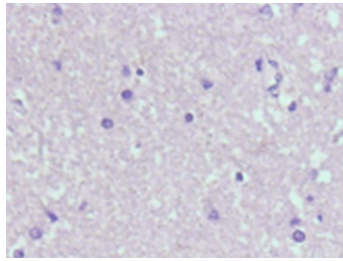

Basal ganglion white matter

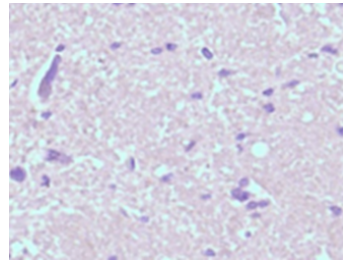

Hippocampus gray matter

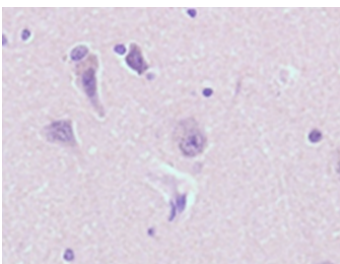

Cerebellum gray matter

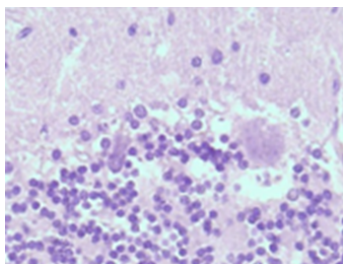

Basal ganglion gray matter

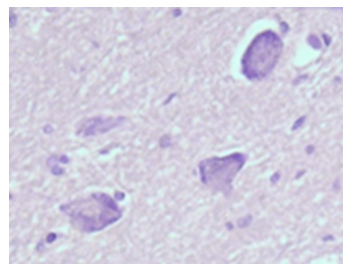

Hippocampus CA neurons

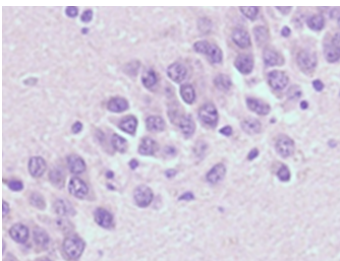

Supplement: jiw545_suppl_supplement_figure_1.pdf [file jiw545_suppl_supplement_figure_1.pdf]
