# Supplementary material
Source: PubMed Central journal article supplement (PMC5853869)

Supplement Figure 2

Subject 92 Cer:

$\alpha$ -LANA

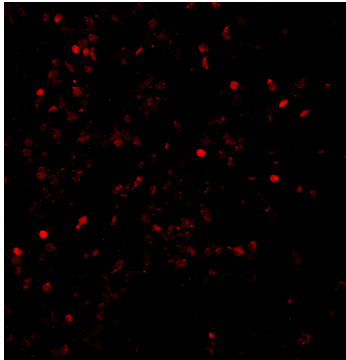

$\alpha$ -VWF

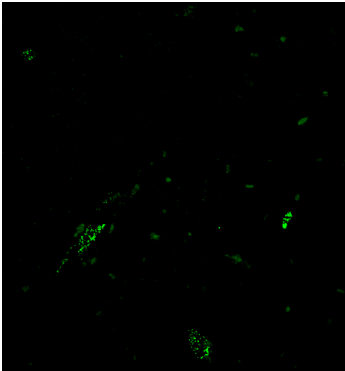

Merge + DAPI

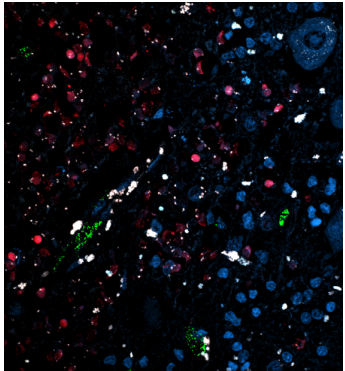

Subject 116 BG:

$\alpha$ -LANA

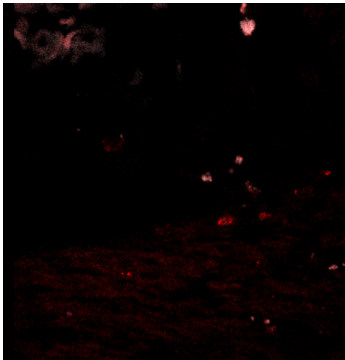

$\alpha$ -CD20

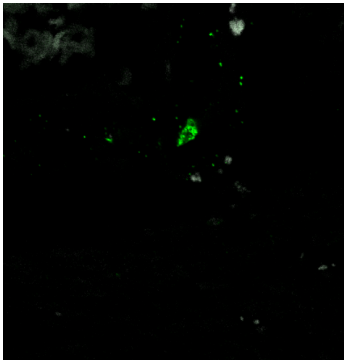

Merge + DAPI

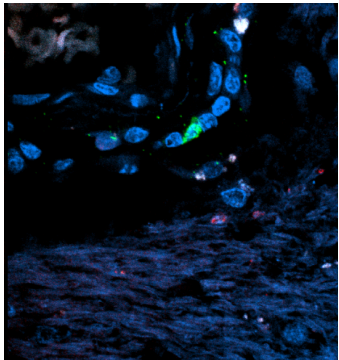

Subject 116 BG:

$\alpha$ -LANA

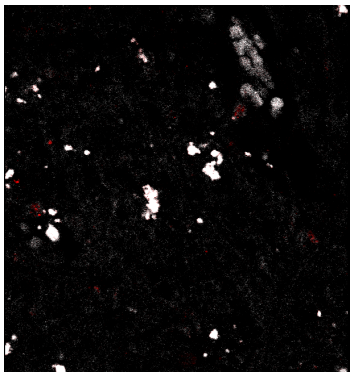

$\alpha$ -CD45

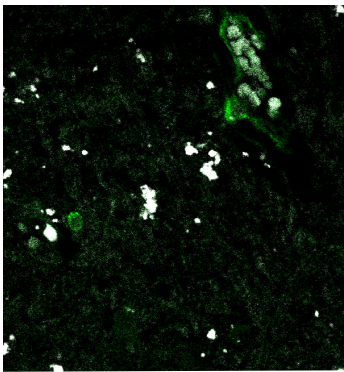

Merge + DAPI

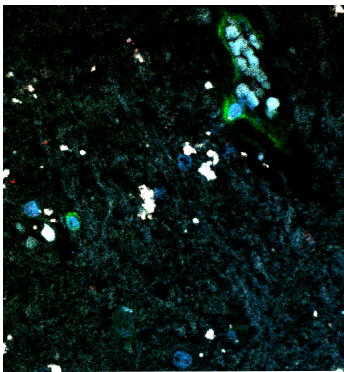

Supplement: jiw545_suppl_supplement_figure_2.pdf [file jiw545_suppl_supplement_figure_2.pdf]
